# Supplementary material for: Mesenchymal stem cells exosomal let-7a-5p improve autophagic flux and alleviate liver injury in acute-on-chronic liver failure by promoting nuclear expression of TFEB
Source: PubMed Central journal article supplement (PMC9556718; doi:10.1038/s41419-022-05303-9), 2022-10-12

### Supplemental Figure 3: Uncropped western blot images

#### Supplemental Figure S3A related to Figure 2C

LC3 17KDa, 14KDa

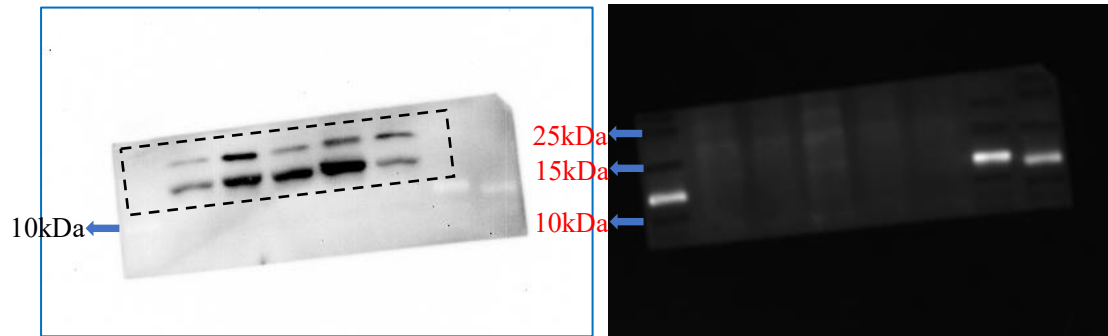

P62 62KDa

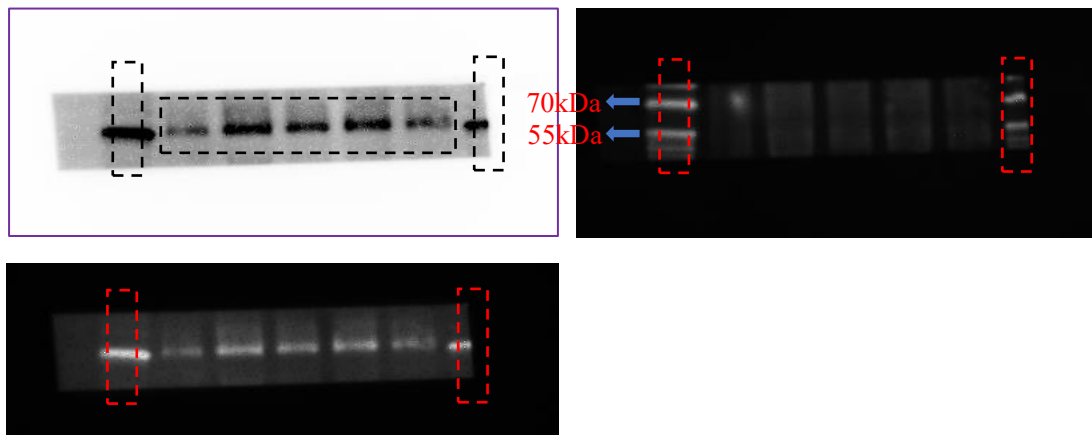

GAPDH 37KDa

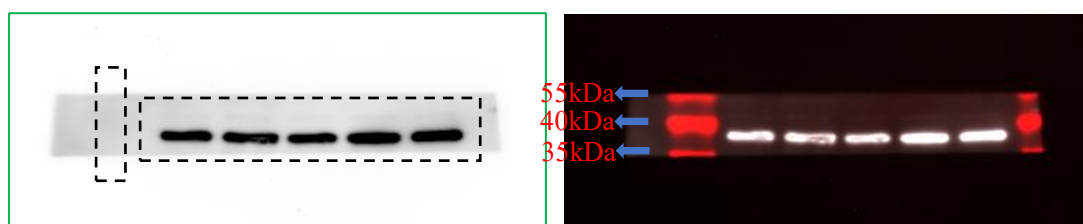

#### Supplemental Figure S3A related to Figure 2G

LC3 17KDa, 14KDa

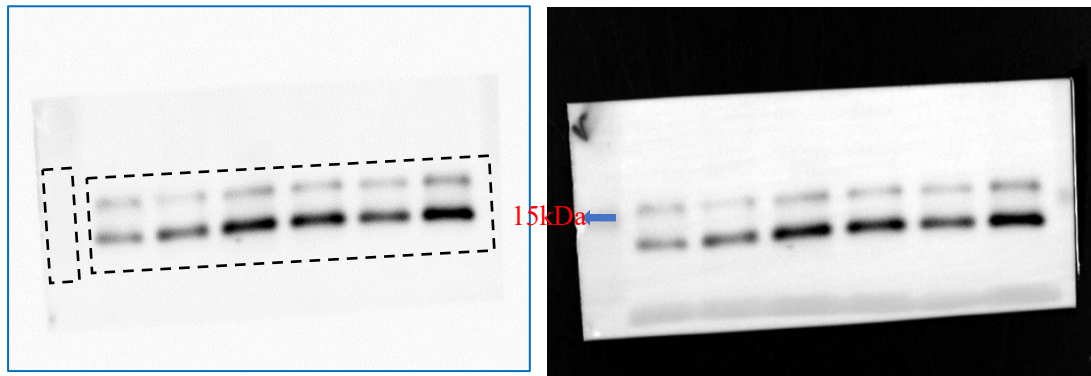

GAPDH 37kDa

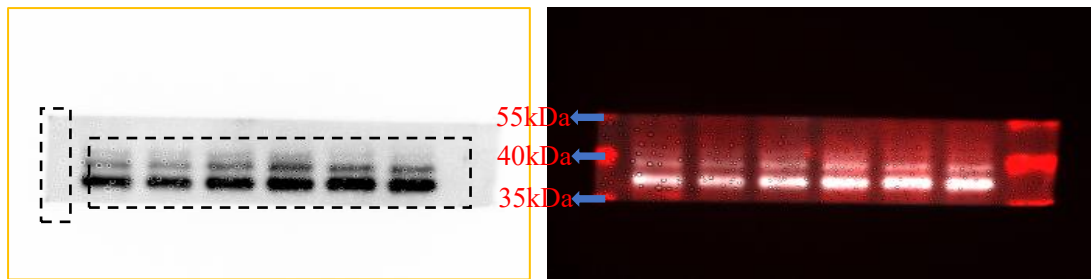

**Supplemental Figure S3B related to Figure 4A**

Cyt.TFEB 65kDa

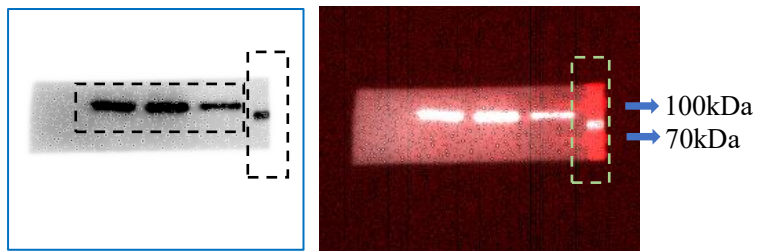

GAPDH 37kDa

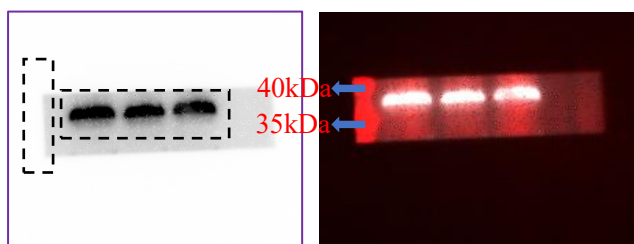

Nucl.TFEB 65kDa

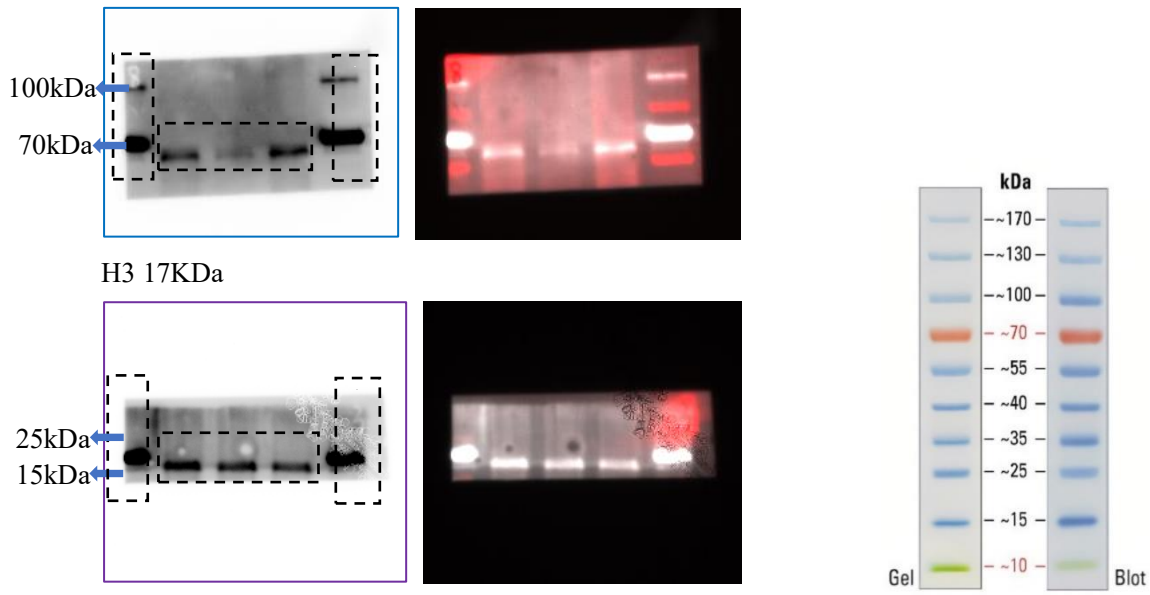

**Supplemental Figure S3B related to Figure 4F**

LC3 17KDa, 14KDa

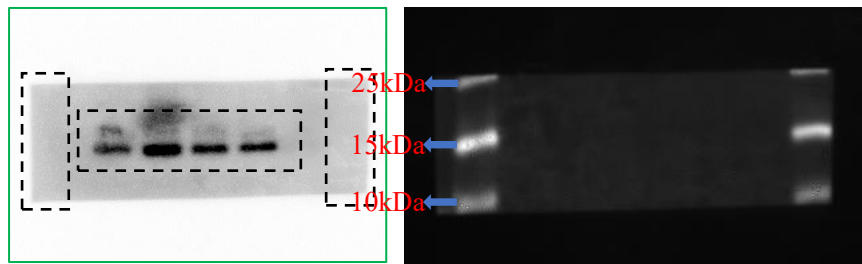

GAPDH 37KDa

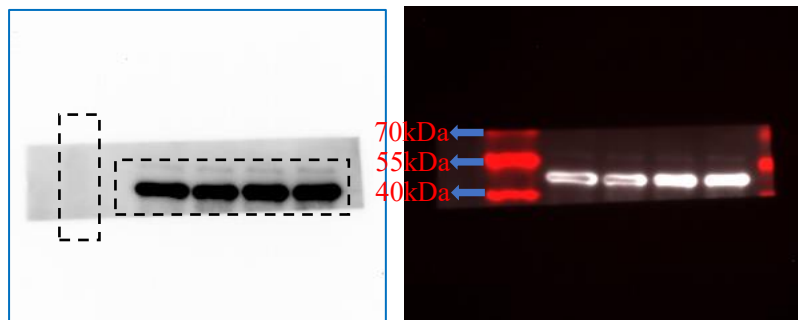

**Supplemental Figure S3C related to Figure 5H**

LC3 17KDa, 14KDa

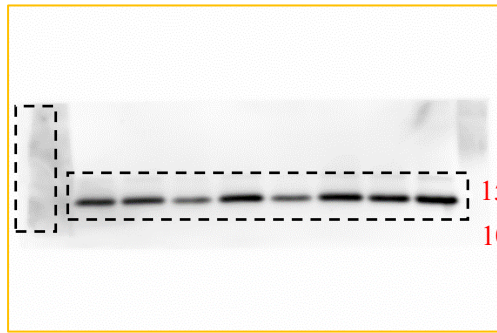

GAPDH 37KDa

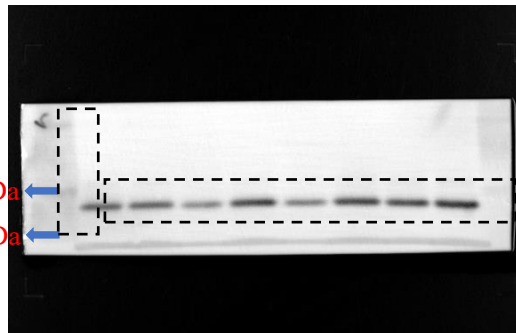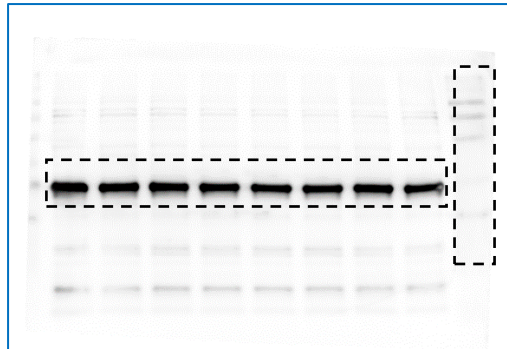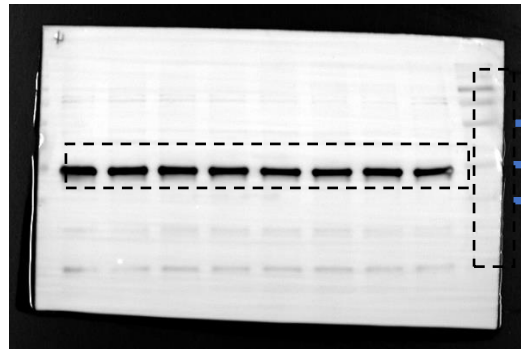

Supplemental Figure S3D related to Figure 6A

TFEB 62KDa

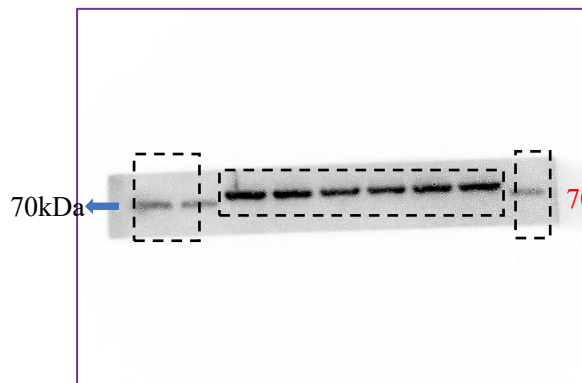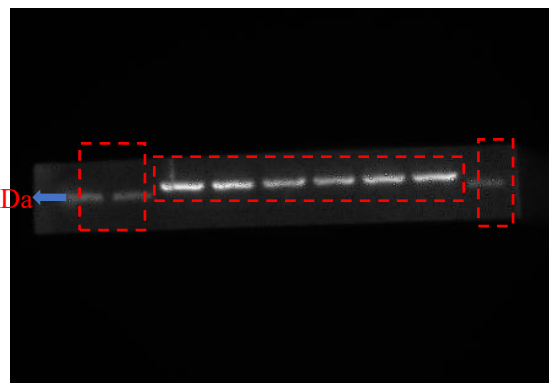

p-TFEB 62KDa

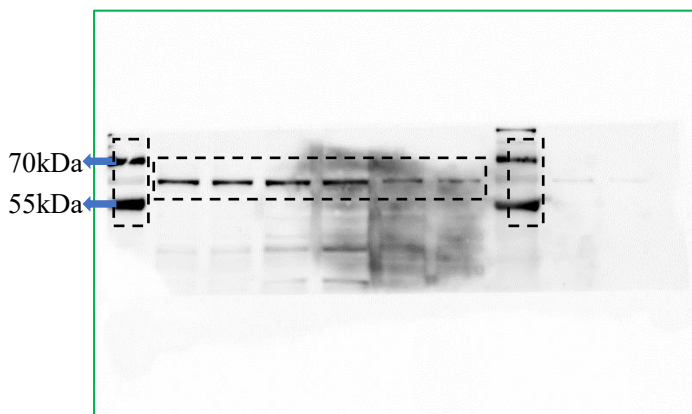

GAPDH 37KDa

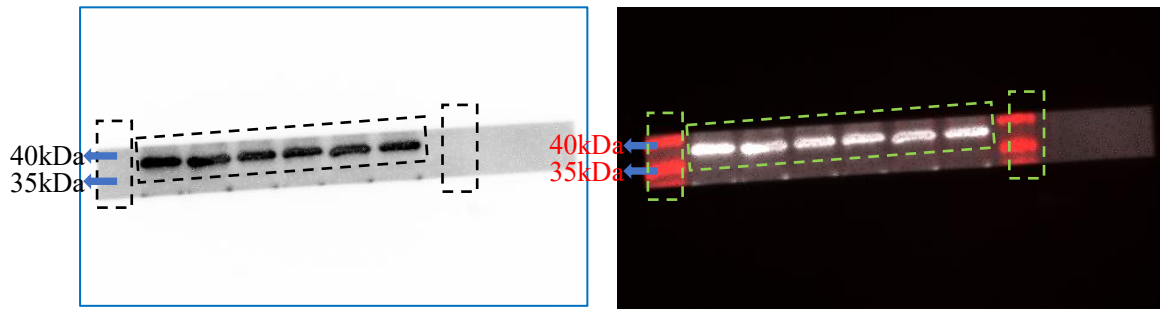

Supplemental Figure S3D related to Figure 6C

TFEB 62KDa

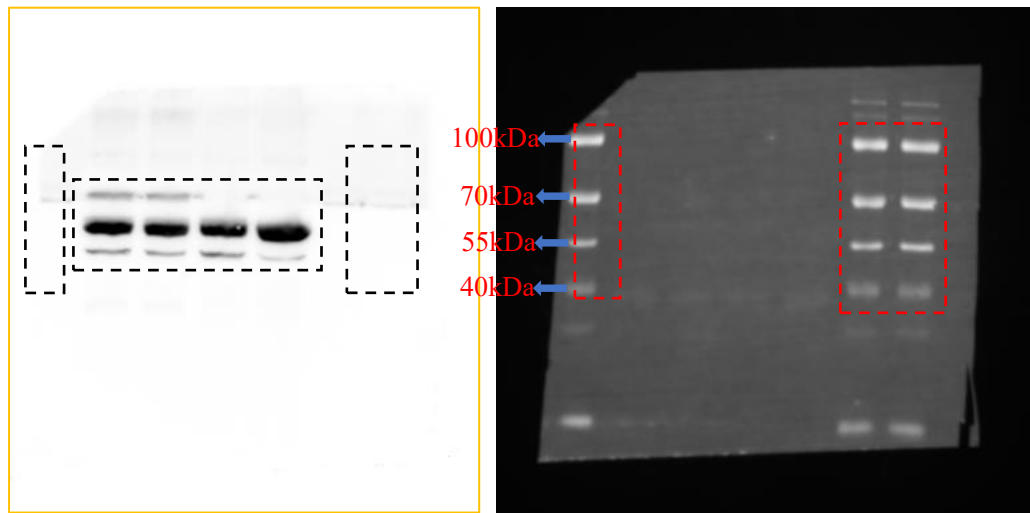

p-TFEB 62KDa

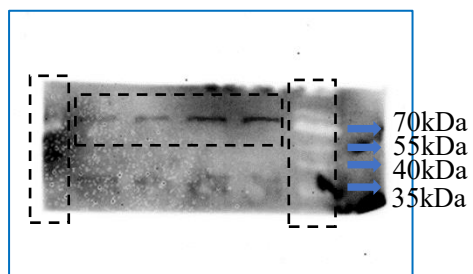

ERK1/2 44KDa, 42KDa

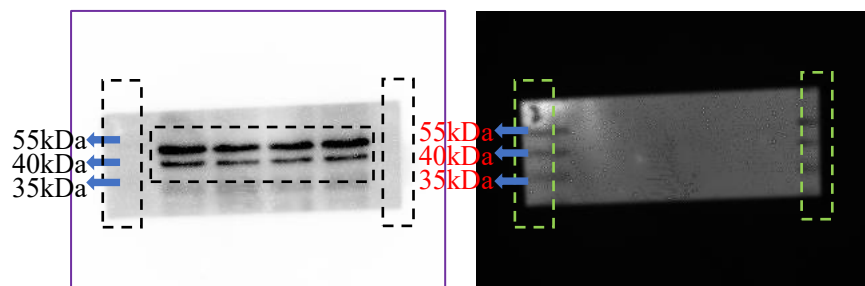

p-ERK1/2 44KDa, 42KDa

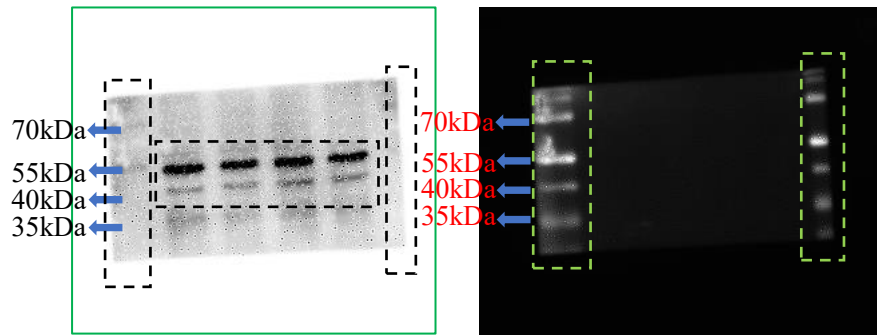

mTOR 289KDa

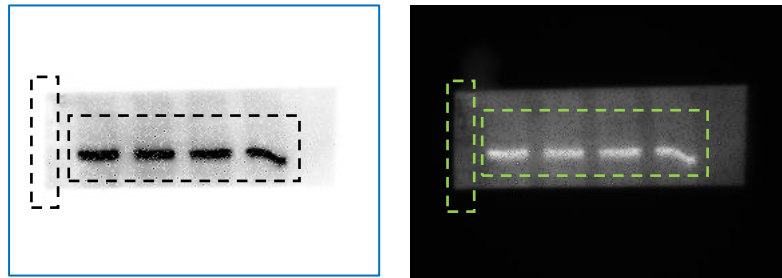

p-mTOR 289KDa

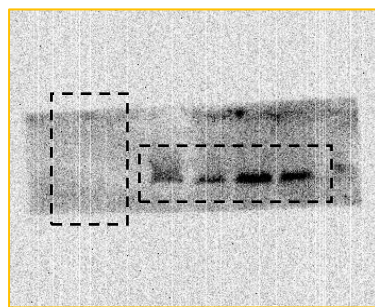

GAPDH 37KDa

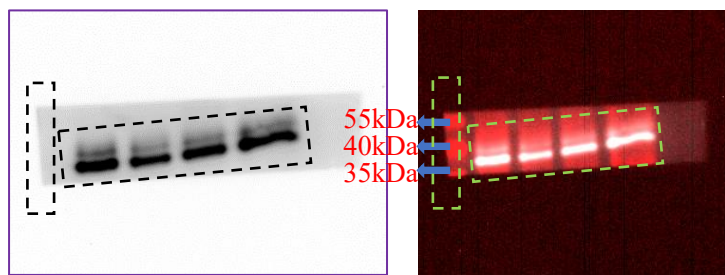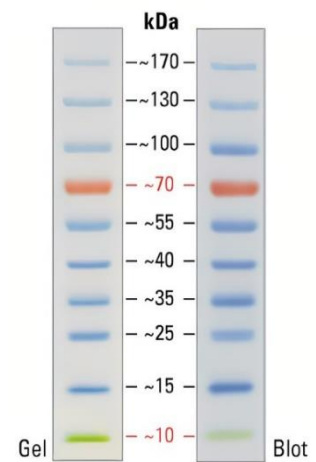

Supplemental Figure S3D related to Figure 6I

TFEB 62KDa

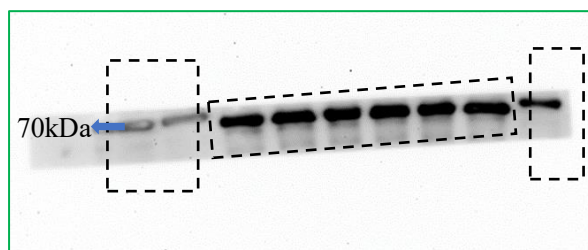

p-TFEB 62KDa

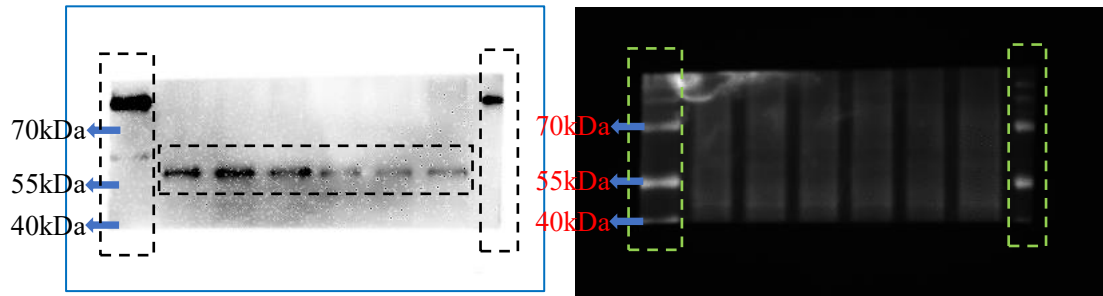

GAPDH 37KDa

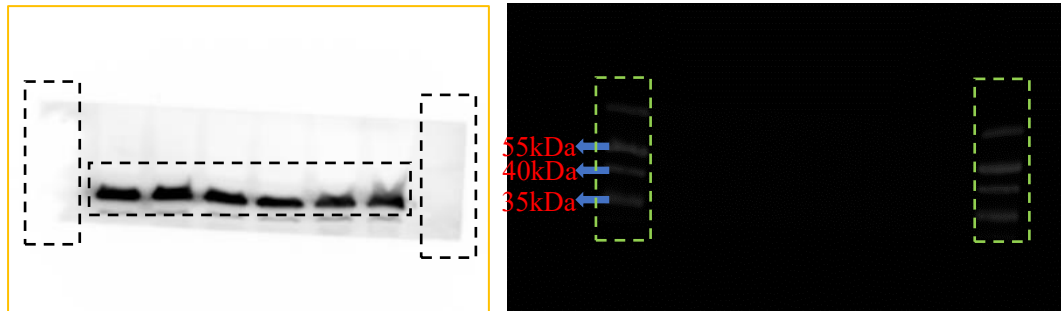

**Supplemental Figure S3D related to Figure 6K**

MAP4K3 101KDa

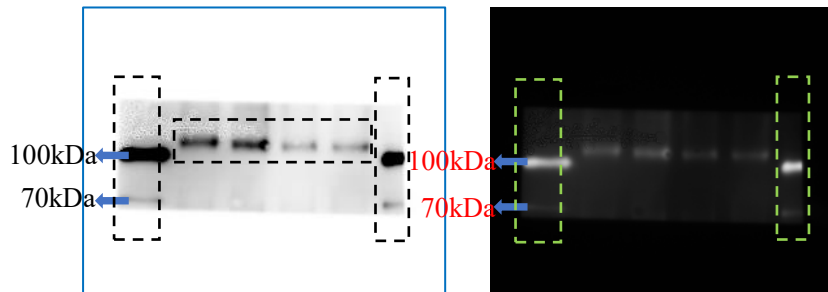

LC3 17KDa, 14KDa

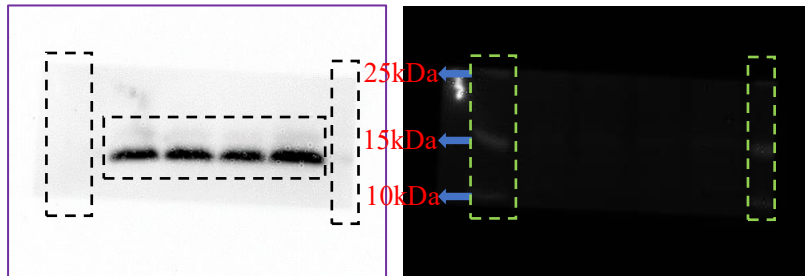

GAPDH 37KDa

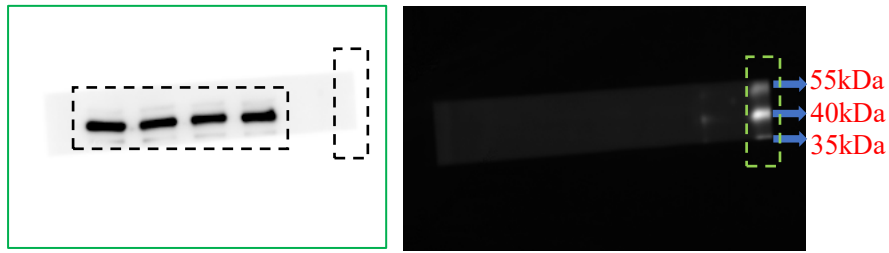

Supplemental Figure S3E related to Figure S1C

CD81 20KDa

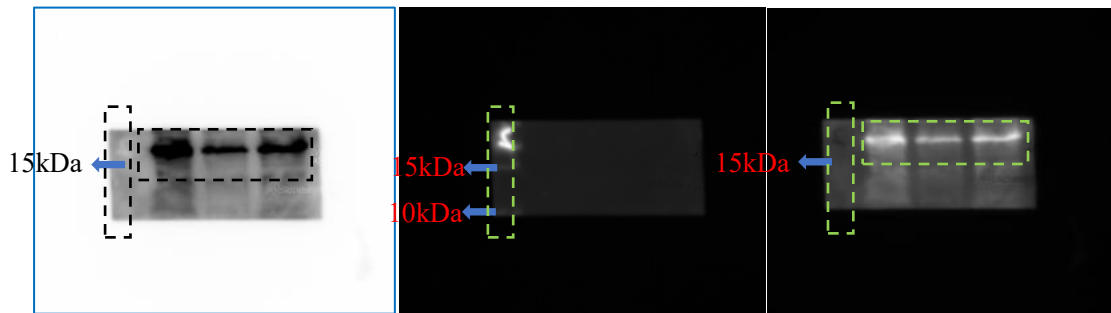

TSG101 50KDa

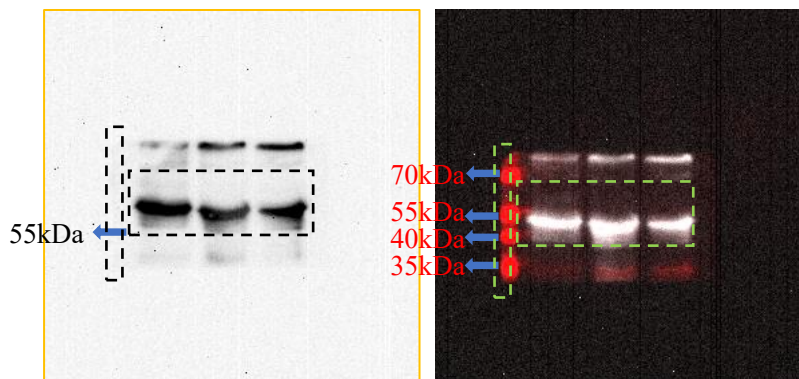

Supplemental Figure S3E related to Figure S2A

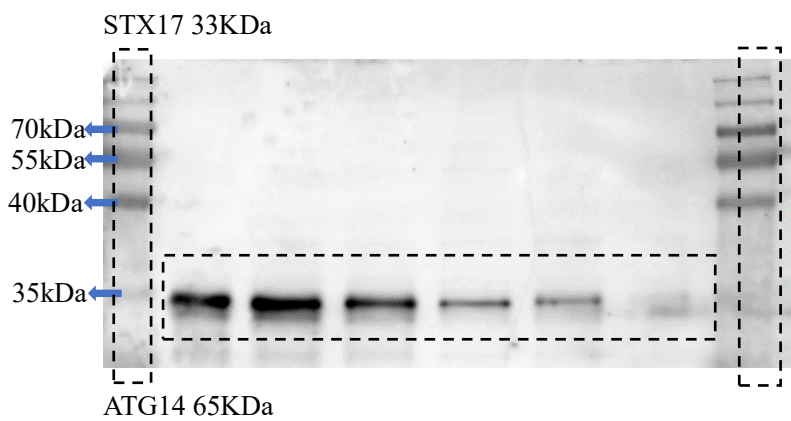



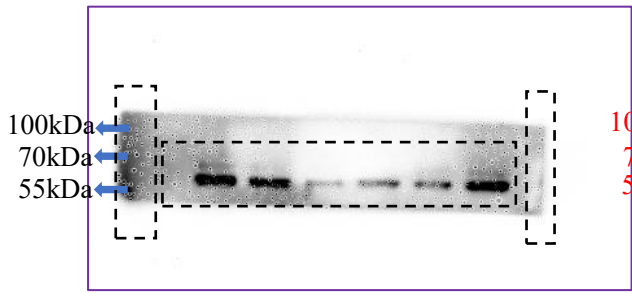

CTSB 27KDa

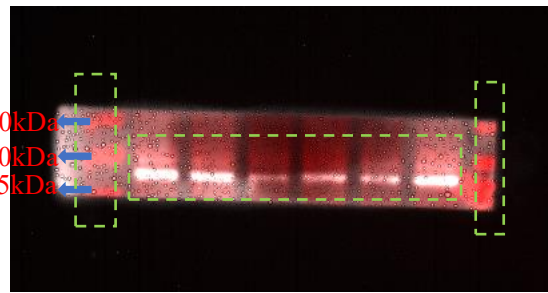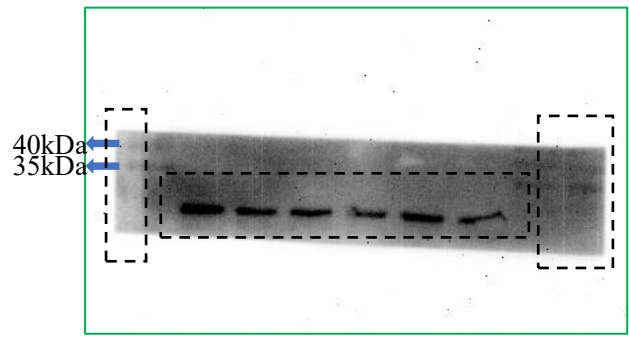

LAMP1 100KDa

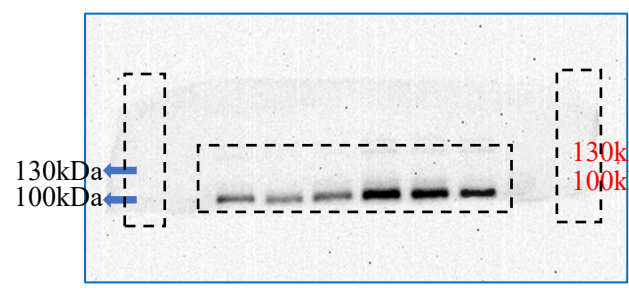

GAPDH-37KDa

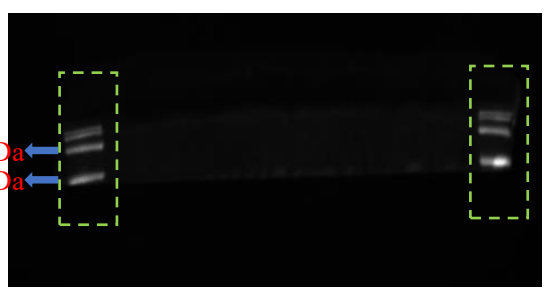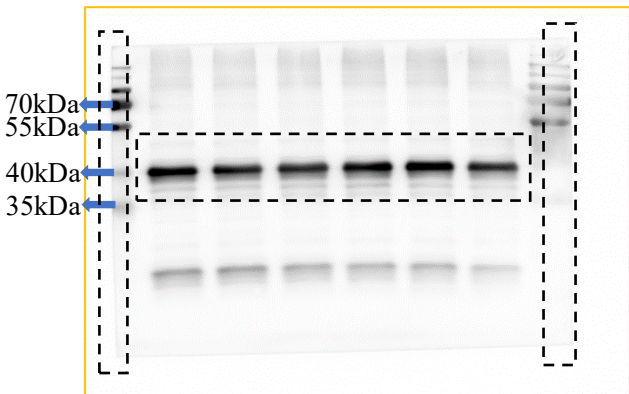

Supplement: 41419_2022_5303_MOESM7_ESM.pdf [file 41419_2022_5303_MOESM7_ESM.pdf]
